# Supplementary material for: A Cross-Sectional Survey on the Clinical Management of Emergence Delirium in Adults: Knowledge, Attitudes, and Practice in Mainland China
Source: MDPI journal article supplement (doi:10.3390/brainsci12080989), 2022-07-26
Supplement: s1 [file s1]

**Table S1. The completed version of the questionnaire.**

---

**A cross-sectional survey on the clinical management of emergence delirium in adults: knowledge, attitude, and practice in mainland China**

---

1. What is your post of duty in the hospital?

☐ Anesthesiologist

☐ Anesthesia nurse

2. How many years have you been working in clinical anesthesia?

\_\_\_\_\_ years

3. How many beds in total in your hospital? \_\_\_\_\_beds

How many surgeries per year in your hospital? \_\_\_\_\_

How many cases of general anesthesia per year in your hospital? \_\_\_\_\_

4. Do you think Emergence Delirium (ED) is an important clinical issue?

☐ Very important

☐ Quite important

☐ Not very important

☐ Not important

5. Do you think the management of ED is an important clinical issue?

☐ Very important

☐ Important

☐ Not important

6. What do you think could be the risk factors for ED? (Multiple choice)

☐ Advanced age

☐ Comorbidities

☐ ASA status

☐ Preoperative fluid fasting

☐ Hyponatremia or hypernatremia

☐ Alcohol-related disorders

☐ Anticholinergic drug

☐ Site of surgery

☐ Intraoperative bleeding

☐ Duration of surgery

☐ Postoperative pain

☐ Catheter-related discomfort

If your options were not included in the abovementioned answers, please list them in the blank\_\_\_\_\_

7. What do you think could be the preventions for ED? (Multiple choice)

☐ Fast-track surgery

☐ No premedication with benzodiazepines

☐ Preoperative risk factors evaluation

☐ Monitor depth of anesthesia

☐ Adequate perioperative pain management

☐ Promptly diagnosing of delirium

If your options were not included in the abovementioned answers, please list them in the blank\_\_\_\_\_

8. Do you think it is necessary to monitor the DOA?

☐ Routine monitor

☐ Only routine in older adult patients

☐ Only routine in high-risk patients

☐ Never monitor

If you have chose the first three options, please list the monitor device in your clinical practice for DOA.

☐ BIS

☐ Sedline

☐ EEG

☐ rSO2

☐ TCD

☐ any device more than abovementioned, please list in the blank\_\_\_\_\_

---

---

9. Do you routinely assess ED?

- ☐ Routine
- ☐ Only routine in older adult patients
- ☐ Only routine in high-risk patients
- ☐ Never

10. If you assess ED, please choose the tools you use.

- ☐ Clinical symptoms
- ☐ Confusion Assessment Method (CAM)
- ☐ Bedside Confusion Scale (BCS)
- ☐ Cognitive Confusion Scale (CTD)
- ☐ Clinical Global Impression Scale Delirium (CGID)

any tool more than abovementioned, please list in the blank\_\_\_\_\_

11. What do you think it should be evaluated for ED?

- ☐ Diagnosis of delirium
- ☐ Classification of delirium
- ☐ Severity of delirium
- ☐ All above

12. Have you ever been with ED?

- ☐ Yes
- ☐ No

If the answer of Q12 is Yes, what was the classification of the delirium?

- ☐ Hyperactive
- ☐ Hypoactive
- ☐ Mix

If the answer of Q12 is Yes, what was the location when ED happened?

- ☐ In the OR
- ☐ In PACU
- ☐ Both OR and PACU

How do you think the role of anesthesia nurse during the management of ED?

- ☐ Very important
- ☐ Important
- ☐ Not important

13. What kind of treatment(s) do you think is proper for ED? (Multiple choice)

- ☐ Nothing
- ☐ Shout to inhibit aggressive behavior
- ☐ Restraint
- ☐ Artery blood gas analysis
- ☐ Sedation
- ☐ Pain management

If your options were not included in the abovementioned answers, please list them in the blank\_\_\_\_\_

14. What do you think is the most effective medication for ED?

- ☐ Intravenous analgesia
- ☐ Propofol
- ☐ Midazolam
- ☐ Dexamedetomidine
- ☐ Haloperidol
- ☐ Droperidol

If your options were not included in the abovementioned answers, please list them in the blank\_\_\_\_\_

---
